# Supplementary material
Source: PubMed Central journal article supplement (PMC490023)
Supplement: pnas_101_29_10566__1.pdf [file pnas_101_29_10566__1.pdf]

**Table 4. Bacterial strains and plasmids used in this study**

| Strain or plasmid           | Relevant characteristic(s)                                                                                                                                                                           | Source      |
|-----------------------------|------------------------------------------------------------------------------------------------------------------------------------------------------------------------------------------------------|-------------|
| <i>Escherichia coli</i>     |                                                                                                                                                                                                      |             |
| XL1-Blue MRF'               | $\Delta(mcrA)183 \Delta(mcrCB-hsdSMR-mrr)173 endA1 supE44 thi-1 recA1 gyrA96 relA1 lac$ [F' <i>proAB lac<sup>f</sup>ZDM15 Tn10</i> (Tet <sup>r</sup> )]                                              | Stratagene  |
| DH5 $\alpha$ MCR            | F <sup>-</sup> <i>mcrA</i> $\Delta$ 1 ( <i>mrr-hsd RMS-mcrBC</i> ) $\Phi$ 80 <i>dlacZ</i> $\Delta$ ( <i>lacZYA-argF</i> )U169 <i>deoR recA1 endA1 supE44 <math>\lambda</math>thi-1 gyr-496 relA1</i> | GIBCO/BRL   |
| <i>B. pseudofirmus</i> OF4  |                                                                                                                                                                                                      |             |
| 811M                        | Met <sup>-</sup> (wild-type)                                                                                                                                                                         | Ref. 1      |
| 811M-M                      | 811M spontaneous mutant strain that improves motility                                                                                                                                                | Ref. 1      |
| SC34                        | 811M $\Delta ncbA::Spc^R$                                                                                                                                                                            | This study  |
| SC34-M                      | SC34 spontaneous mutant strain that improves motility                                                                                                                                                | This study  |
| SC34-R                      | SC34 <i>ncbA</i> restored                                                                                                                                                                            | This study  |
| SC34-MR                     | SC34-M <i>ncbA</i> restored                                                                                                                                                                          | This study  |
| Mot6                        | 811M $\Delta motPS::Cm^R$                                                                                                                                                                            | Ref. 1      |
| SC34/Mot6                   | 811M $\Delta ncbA::Spc^R \Delta motPS::Cm^R$                                                                                                                                                         | This study  |
| Plasmids                    |                                                                                                                                                                                                      |             |
| pG <sup>+</sup> host4       | Temperature-sensitive plasmid vector Erm <sup>R</sup>                                                                                                                                                | Appligene   |
| pMW118                      | Cloning vector Amp <sup>R</sup>                                                                                                                                                                      | Nippon Gene |
| pGEM3-zf (+)                | Cloning vector Amp <sup>R</sup>                                                                                                                                                                      | Promega     |
| pYM1                        | Cloning vector Amp <sup>R</sup> Cm <sup>R</sup> Erm <sup>R</sup>                                                                                                                                     | Ref. 1      |
| pTracer <sup>TM</sup> -CMV2 | Mammalian expression vectors                                                                                                                                                                         | Invitrogen  |
| pCMVSC7                     | PTracer-CMV2+ <i>ncbA</i>                                                                                                                                                                            | This study  |
| pCMVSC7-Ca                  | PTracer-CMV2+ <i>ncbA</i> ( <sub>191</sub> LESWAS <sub>196</sub> → <sub>191</sub> LDDWAD <sub>196</sub> )                                                                                            | This study  |
| PMW $\Delta ncbA$           | PMW118+ $\Delta ncbA$                                                                                                                                                                                | This study  |
| pMW $\Delta ncbA::Spc^R$    | pMW118+ $\Delta ncbA::Spc^R$                                                                                                                                                                         | This study  |
| pG $\Delta ncbA::Spc^R$     | pG <sup>+</sup> host4+ $\Delta ncbA::Spc^R$                                                                                                                                                          | This study  |
| PSC                         | pYM1+ <i>ncbA</i>                                                                                                                                                                                    | This study  |
| pSC-Ca                      | pYM1+ <i>ncbA</i> ( <sub>191</sub> LESWAS <sub>196</sub> → <sub>191</sub> LDDWAD <sub>196</sub> )                                                                                                    | This study  |
| pGSCR11                     | pGEM3-zf (+)+ <i>ncbA</i> (E244E)                                                                                                                                                                    | This study  |
| pG <sup>+</sup> host4-SCR11 | pG <sup>+</sup> host4+ <i>ncbA</i> (E244E)                                                                                                                                                           | This study  |

1. Ito, M., Hicks, D. B., Henkin, T. M., Guffanti, A. A., Powers, B., Zvi, L., Uematsu, K. & Krulwich, T. A. (2004). *Mol. Microbiol.*, in press.
